# Supplementary material for: Quantum Chemical and Experimental Evaluation of a 4-Amino-Antipyrine Based Schiff Base as Corrosion Inhibitor for Steel Material
Source: PubMed Central journal article supplement (PMC10956091; doi:10.1021/acsomega.3c10048), 2024-03-08
Supplement: ao3c10048_si_001.pdf [file ao3c10048_si_001.pdf]

## **SUPPLEMENTARY FILE**

### **Evaluation of a 4-amino-antipyrine based Schiff base as corrosion inhibitor for steel material**

**Ashwini Narayanswamy<sup>1</sup>, Dileep Ramakrishna<sup>1</sup>, P.V. Raja Shekar<sup>2</sup>, Shashanka  
Rajendrachari<sup>3\*</sup>, Ranganatha Sudhakar<sup>1\*</sup>**

<sup>1</sup>Department of Chemistry, Presidency University, Rajanakunte, Bengaluru 560064, India

<sup>2</sup>Department of Physics, SR University, Warangal 506371, India

<sup>3</sup>Department of Metallurgical and Materials Engineering, Bartin University, Bartin-74100,  
Turkey

**\*Corresponding authors:** [kamath.ranganath@gmail.com](mailto:kamath.ranganath@gmail.com), [shashankaic@gmail.com](mailto:shashankaic@gmail.com)

## **Contents**

### **Materials and Methods**

**Figure S1: Mass Spectrum of complexes 4-[(4-Nitrobenzylidene)-amino]-antipyrine (4-NBAAP).**

**Figure S2: UV Spectrum of 4-[(4-Nitrobenzylidene)-amino]-antipyrine (4-NBAAP).**

**Figure S3: FTIR Spectrum of 4-[(4-Nitrobenzylidene)-amino]-antipyrine (4-NBAAP).**

**Figure S4: <sup>1</sup>H NMR Spectrum of 4-[(4-Nitrobenzylidene)-amino]-antipyrine (4-NBAAP).**

**Figure S5: <sup>13</sup>C NMR Spectrum of 4-[(4-Nitrobenzylidene)-amino]-antipyrine (4-NBAAP).**

**Figure S6: Corrosion parameters of mild steel in 1M HCl in different inhibitor concentration at different temperatures.**

**Figure S7: Weight loss measurement process and fresh crystals of 4-[(4-Nitrobenzylidene)-amino]-antipyrine (4-NBAAP).**

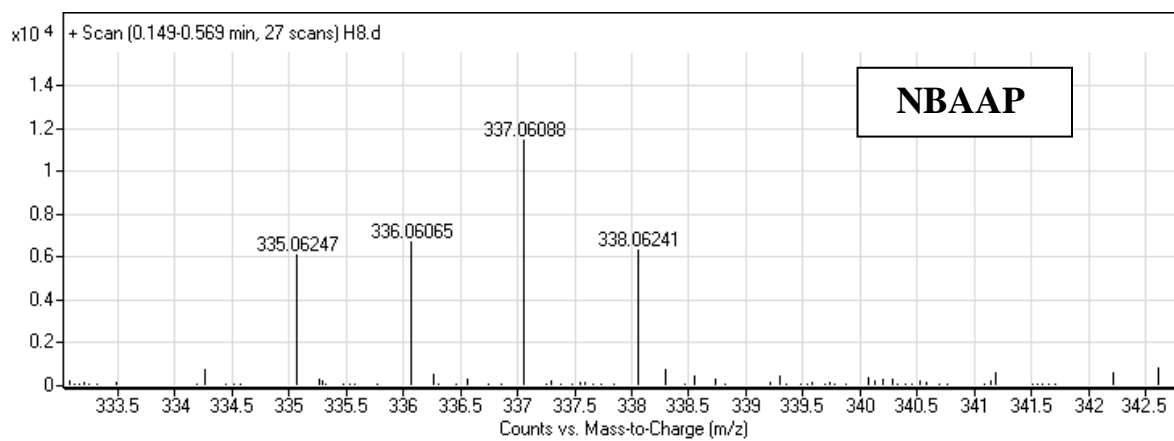

**Figure S1: Mass Spectrum of complexes 4-[(4-Nitrobenzylidene)-amino]-antipyrine (4-NBAAP).**

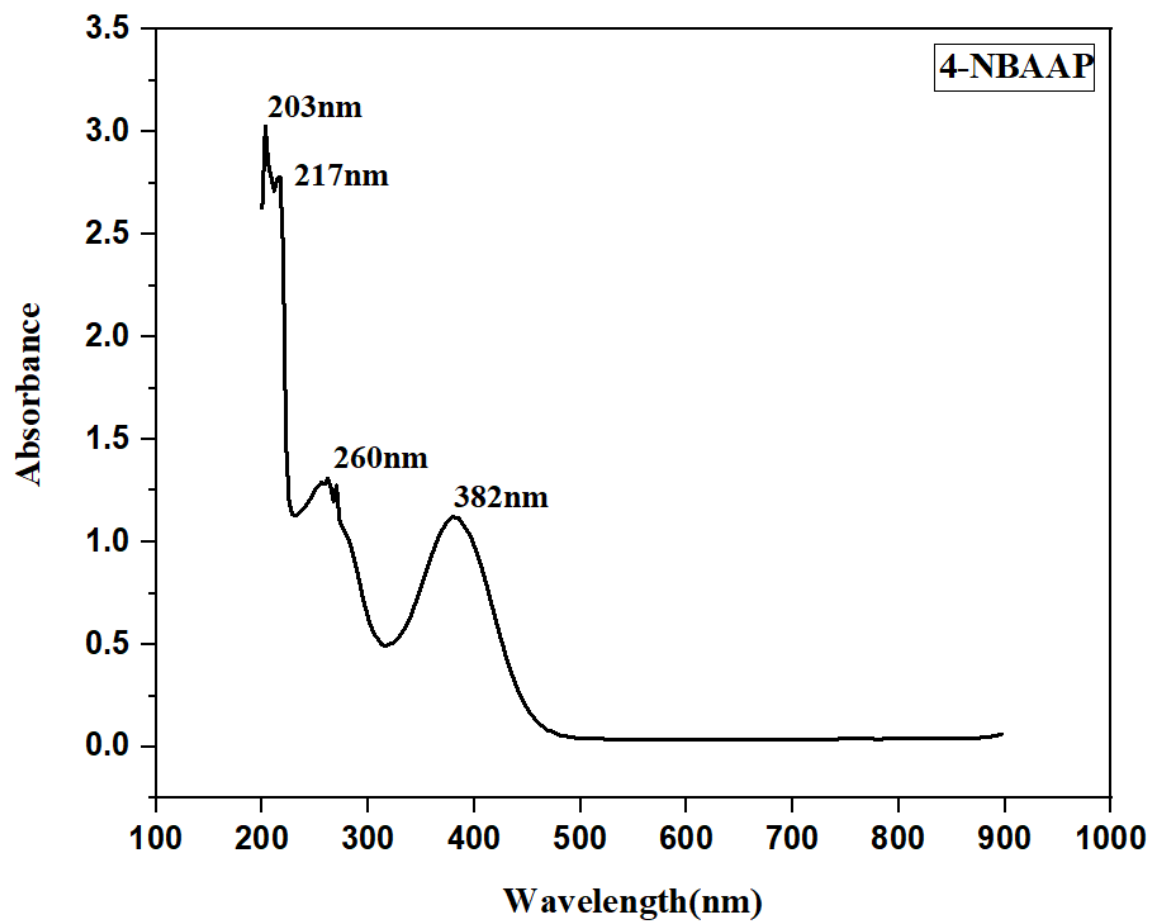

Figure S2: UV Spectrum of 4-[(4-Nitrobenzylidene)-amino]-antipyrine (4-NBAAP).

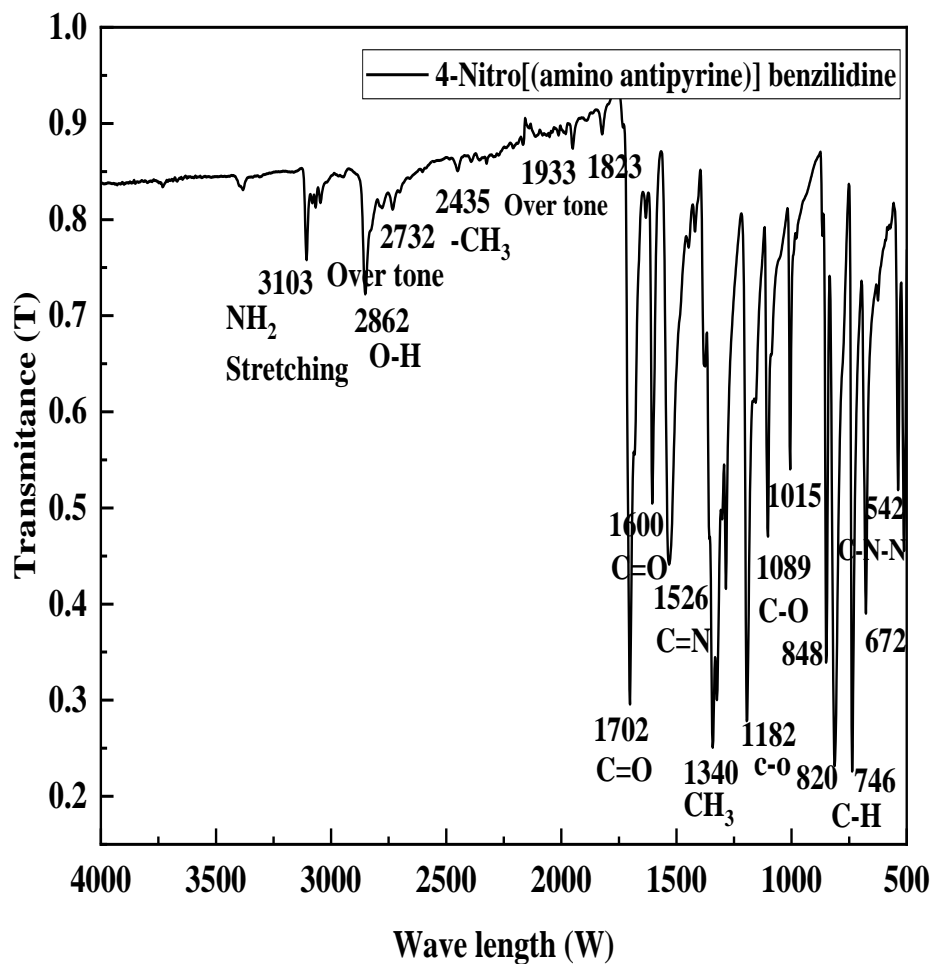

Figure S3: FTIR Spectrum of 4-[(4-Nitrobenzylidene)-amino]-antipyrine (4-NBAAP)

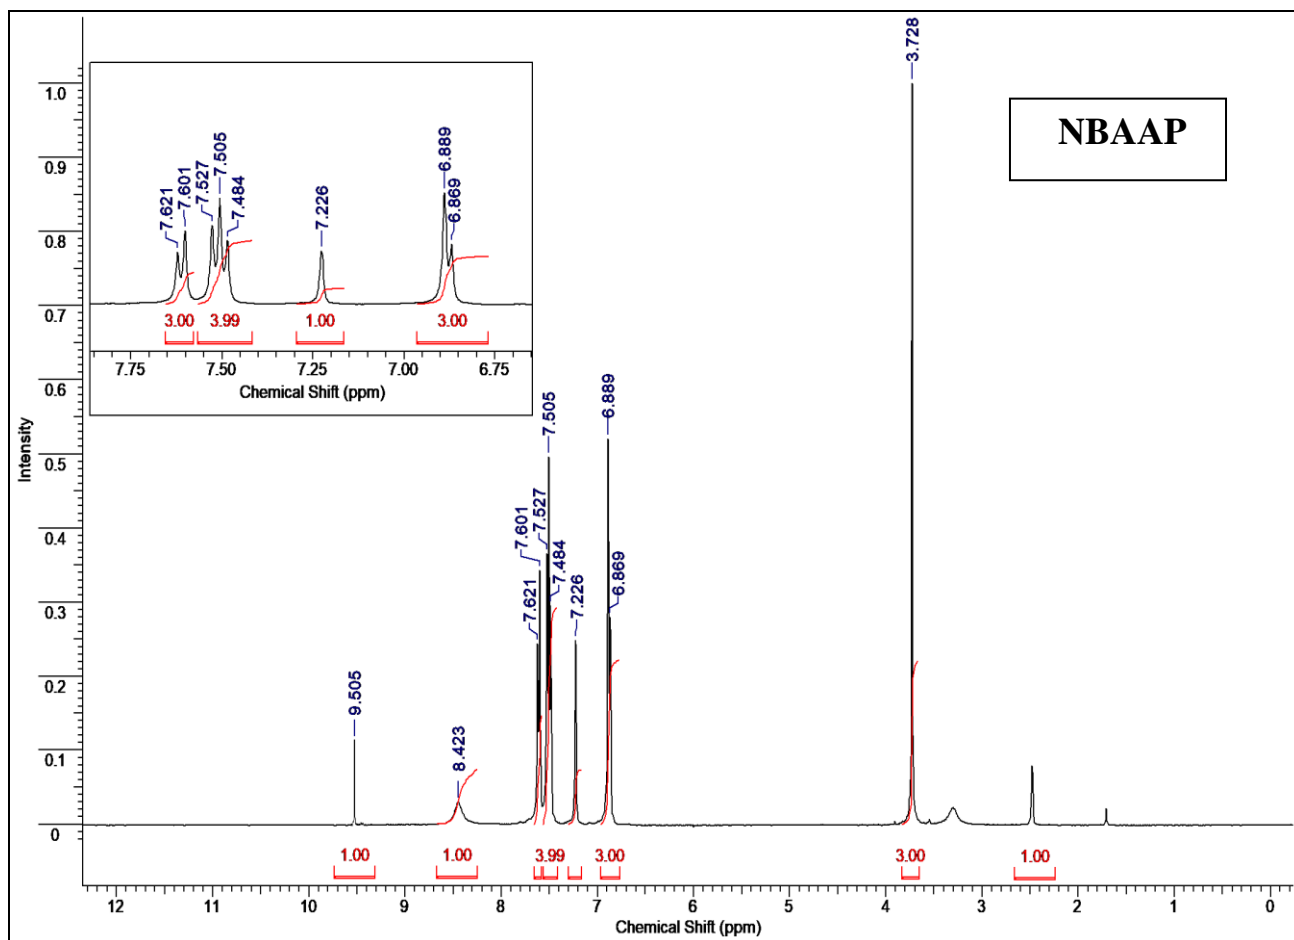

Figure S4:  $^1\text{H}$  NMR Spectrum of 4-[(4-Nitrobenzylidene)-amino]-antipyrine (4-NBAAP).

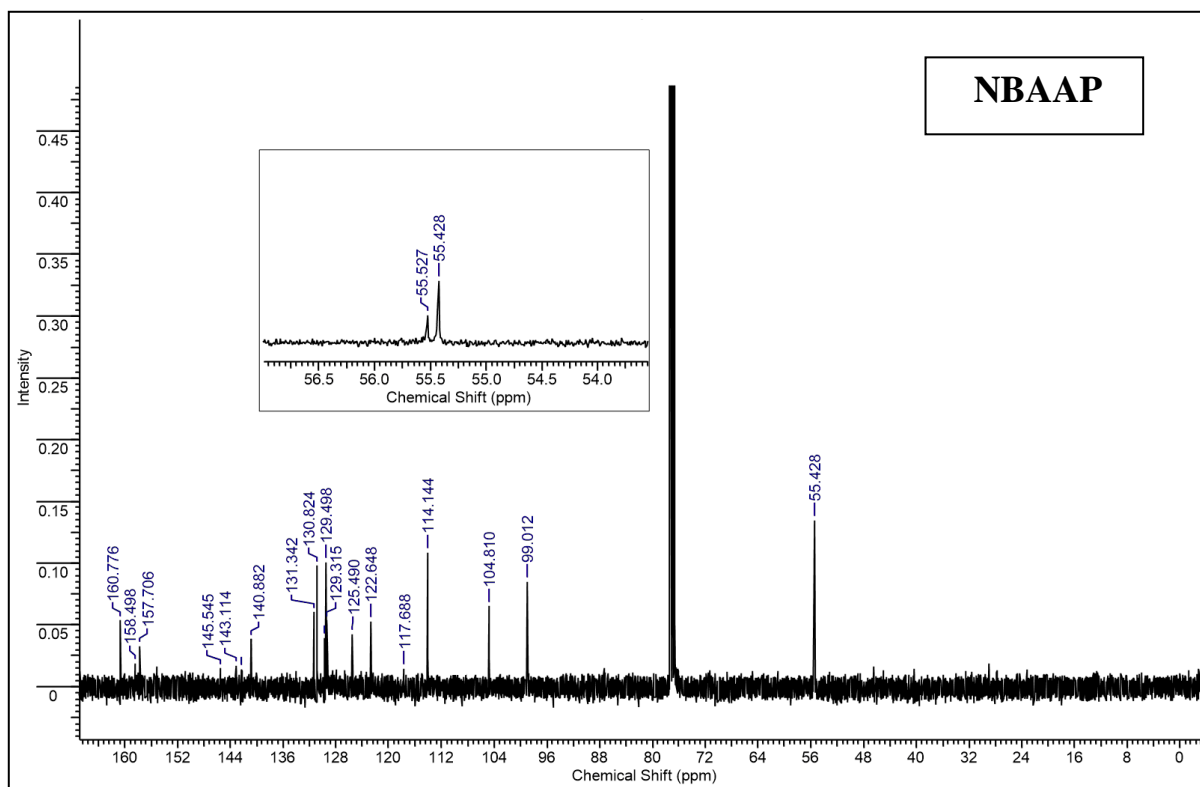

**Figure S5:  $^{13}\text{C}$  NMR Spectrum of 4-[(4-Nitrobenzylidene)-amino]-antipyrine (4-NBAAP)**

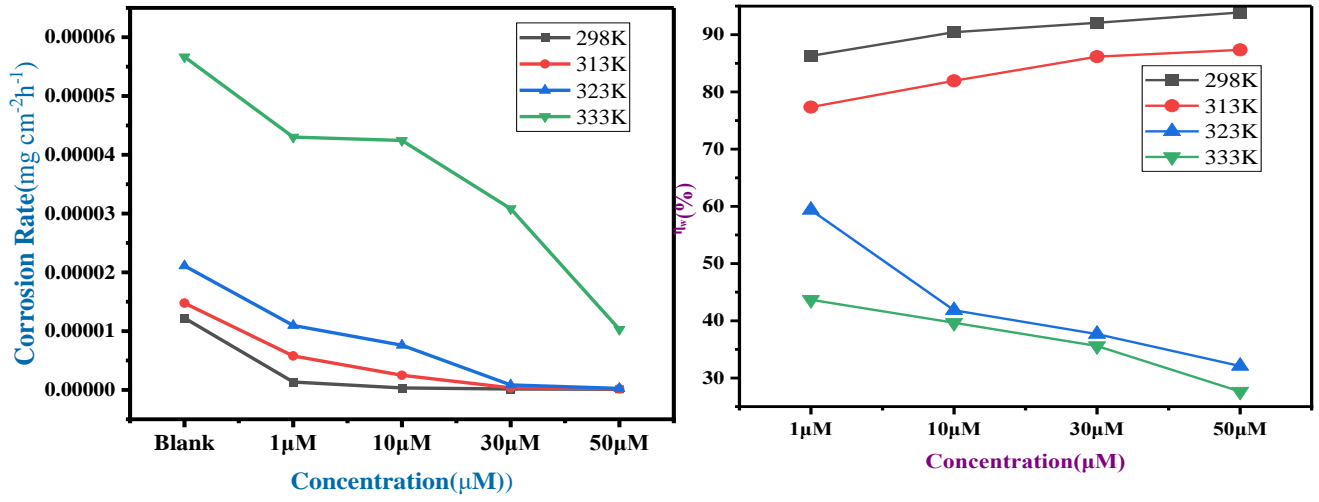

**Figure S6: Corrosion parameters of mild steel in 1M HCl in different inhibitor concentration at different temperatures.**



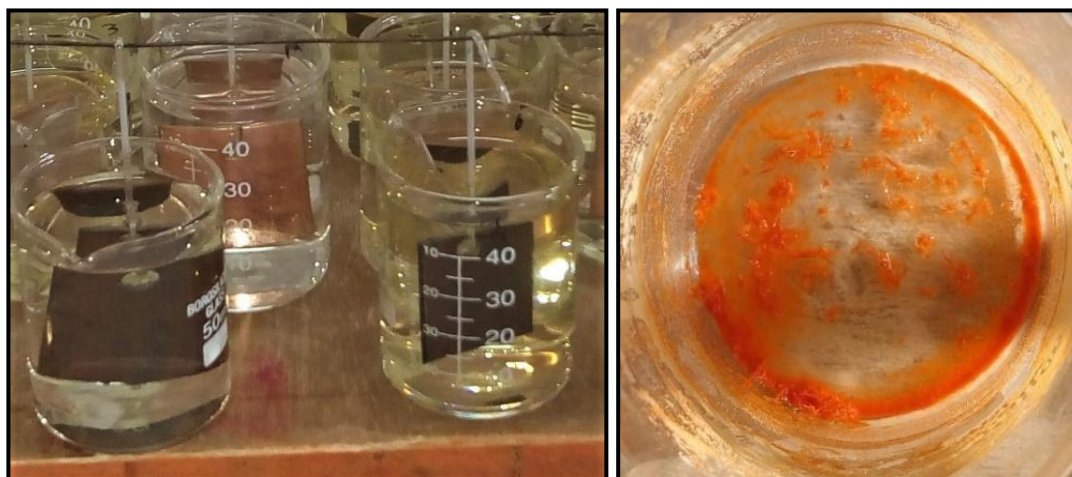

**Figure S7: Weight loss measurement process and fresh crystals of 4-[(4-Nitrobenzylidene)-amino]-antipyrine (4-NBAAP).**
